# Supplementary material
Source: PubMed Central journal article supplement (PMC4130826)
Supplement: jn.114.192708_nutrition192708SupplementaryData1.pdf [file jn.114.192708_nutrition192708SupplementaryData1.pdf]

Online Supporting Material

**Supplemental Table 1** Baseline characteristics among 24,032 participants in the Malmö diet and cancer cohort according to incident cardiovascular disease event during 14 y of follow-up<sup>1</sup>

| Characteristics                    | Total <i>n</i> | Non-CVD cases<br>( <i>n</i> = 21,384) | Incident CVD-cases<br>( <i>n</i> = 2,648) | <i>P</i> |
|------------------------------------|----------------|---------------------------------------|-------------------------------------------|----------|
| Women <sup>2</sup> , %             | 14 926         | 64.6                                  | 41.9                                      | <0.001   |
| Age, y                             | 24 032         | 57.4 (57.3-57.5)                      | 61.8 (61.6-62.1)                          | <0.001   |
| BMI, kg/m <sup>2</sup>             | 24 003         | 25.6 (25.5-25.6)                      | 26.2 (26.0-26.3)                          | <0.001   |
| FADS rs174546                      | 24 032         |                                       |                                           | 0.44     |
| C/C                                | 10 710         | 44.5                                  | 45.4                                      |          |
| C/T                                | 10 661         | 44.5                                  | 43.2                                      |          |
| T/T                                | 2661           | 11.0                                  | 11.4                                      |          |
| Alcohol consumption, %             | 24 032         |                                       |                                           | <0.001   |
| Zero reporters                     | 1474           | 5.9                                   | 7.9                                       |          |
| Low                                | 9712           | 39.9                                  | 44.3                                      |          |
| Moderate                           | 5658           | 23.8                                  | 21.8                                      |          |
| High                               | 5243           | 22.2                                  | 19.0                                      |          |
| Very high                          | 1945           | 8.2                                   | 6.9                                       |          |
| Cigarette smoking status, %        | 24 022         |                                       |                                           | <0.001   |
| Current smoker                     | 6777           | 27.3                                  | 35.3                                      |          |
| Ex-smoker                          | 7944           | 33.1                                  | 32.7                                      |          |
| Never smoker                       | 9301           | 39.6                                  | 32.0                                      |          |
| Education, %                       | 23 977         |                                       |                                           | <0.001   |
| Elementary                         | 9890           | 39.7                                  | 54.1                                      |          |
| Primary and secondary              | 6354           | 26.9                                  | 23.1                                      |          |
| Upper secondary                    | 2142           | 9.1                                   | 7.8                                       |          |
| Further education without a degree | 2128           | 9.2                                   | 6.5                                       |          |
| University degree                  | 3463           | 15.2                                  | 8.5                                       |          |
| Leisure time physical activity, %  | 23 881         |                                       |                                           | <0.001   |
| Very low                           | 2341           | 9.4                                   | 12.8                                      |          |
| Low                                | 7916           | 33.3                                  | 32.0                                      |          |
| Medium                             | 6849           | 29.0                                  | 26.1                                      |          |
| High                               | 4638           | 19.5                                  | 19.0                                      |          |
| Very high                          | 2137           | 8.8                                   | 10.0                                      |          |
| Dietary intakes                    | 24 032         |                                       |                                           |          |
| Total energy intake, MJ/day        |                | 9.53 (9.50-9.56)                      | 9.50 (9.41-9.60)                          | 0.24     |
| Protein, E%                        |                | 15.8 (15.7-15.8)                      | 15.7 (15.6-15.8)                          | 0.26     |
| Carbohydrates, E%                  |                | 45.2 (45.1-45.3)                      | 45.2 (44.9-45.4)                          | 0.77     |
| Fiber, g/MJ                        |                | 2.17 (2.16-2.17)                      | 2.11 (2.09-2.14)                          | <0.001   |
| Total fat, E%                      |                | 39.1 (39.0-39.1)                      | 39.1 (38.9-39.4)                          | 0.87     |
| SFAs, E%                           |                | 16.8 (16.7-17.0)                      | 16.9 (16.8-16.9)                          | 0.66     |
| MUFAs, E%                          |                | 13.6 (13.6-13.6)                      | 13.7 (13.6-13.7)                          | 0.42     |
| PUFAs, E%                          |                | 6.16 (6.14-6.18)                      | 6.20 (6.14-6.26)                          | 0.21     |
| Dietary PUFA intakes               | 24 032         |                                       |                                           |          |
| ALA, E%                            |                | 0.74 (0.74-0.75)                      | 0.75 (0.74-0.76)                          | 0.30     |
| Long-chain n-3 PUFAs, E%           |                | 0.26 (0.25-0.26)                      | 0.26 (0.25-0.26)                          | 0.81     |
| Total n-3 PUFAs, E%                |                | 1.00 (1.00-1.00)                      | 1.00 (0.99-1.02)                          | 0.57     |
| LA, E%                             |                | 4.91 (4.89-4.93)                      | 4.95 (4.89-5.01)                          | 0.16     |
| Total n-6 PUFAs, E%                |                | 4.98 (4.96-5.00)                      | 5.02 (4.96-5.07)                          | 0.15     |
| ALA/LA, E%                         |                | 0.16 (0.16-0.16)                      | 0.16 (0.16-0.16)                          | 0.59     |
| Total n-3/n-6 PUFAs, E%            |                | 0.21 (0.21-0.21)                      | 0.21 (0.21-0.21)                          | 0.43     |

<sup>1</sup>Data is expressed as mean (95% CI) for continuous variables or as proportions (%) for categorical variables. ALA,  $\alpha$ -linolenic acid; CVD, cardiovascular disease; E%, energy percentage; FADS, fatty acid desaturase; LA, linoleic acid.

<sup>2</sup>The difference in baseline characteristics between cases and non-cases were tested using chi-square analyses for categorical variables or with general linear model for continuous variables,  $P < 0.05$ . Continuous variables were adjusted for age and sex and ln transformed when testing differences of means.
