# Supplementary material
Source: PubMed Central journal article supplement (PMC4130826)
Supplement: jn.114.192708_nutrition192708SupplementaryData2.pdf [file jn.114.192708_nutrition192708SupplementaryData2.pdf]

Online Supporting Material

Supplemental Table 2 Participant characteristics in the lowest and highest PUFA intake quintiles among 24,032 participants in the Malmö diet and cancer cohort<sup>1</sup>

| Characteristics                    | ALA             |                 | LC n-3          |                 | Total n-3       |                 | LA              |                 | Total n-6       |                 | ALA/LA          |                 | n-3/n-6         |                 |
|------------------------------------|-----------------|-----------------|-----------------|-----------------|-----------------|-----------------|-----------------|-----------------|-----------------|-----------------|-----------------|-----------------|-----------------|-----------------|
|                                    | Q1              | Q5              |
| Women <sup>2</sup> , %             | 62.9            | 59.7            | 67.6            | 58.0            | 66.6            | 57.9            | 65.6            | 56.9            | 65.8            | 56.7            | 57.1            | 63.9            | 61.6            | 61.8            |
| Age, y                             | 57.1            | 57.3            | 53.8            | 60.6            | 55.6            | 59.7            | 58.6            | 56.2            | 58.5            | 56.2            | 55.6            | 58.9            | 54.4            | 60.8            |
|                                    | (50.8-<br>63.8) | (51.2-<br>63.9) | (49.3-<br>61.2) | (53.9-<br>65.3) | (49.8-<br>62.6) | (53.1-<br>65.2) | (51.7-<br>65.5) | (50.6-<br>62.8) | (51.6-<br>65.5) | (50.6-<br>62.8) | (50.2-<br>62.1) | (52.0-<br>65.5) | (49.6-<br>61.2) | (53.8-<br>66.1) |
| BMI, kg/m <sup>2</sup>             | 25.3            | 24.9            | 24.7            | 25.5            | 25.1            | 25.4            | 25.0            | 25.2            | 24.9            | 25.2            | 25.3            | 24.8            | 25.1            | 25.2            |
|                                    | (23.0-<br>27.9) | (22.7-<br>27.7) | (22.5-<br>27.4) | (23.3-<br>28.1) | (22.8-<br>27.8) | (23.1-<br>28.0) | (22.7-<br>27.5) | (23.0-<br>28.0) | (22.7-<br>27.5) | (23.0-<br>28.0) | (23.0-<br>27.9) | (22.6-<br>27.4) | (22.9-<br>27.8) | (22.9-<br>27.8) |
| Season, %                          |                 |                 |                 |                 |                 |                 |                 |                 |                 |                 |                 |                 |                 |                 |
| Winter                             | 23.2            | 22.7            | 24.6            | 21.5            | 24.1            | 21.8            | 24.8            | 22.6            | 24.9            | 22.5            | 21.9            | 24.6            | 23.5            | 23.2            |
| Spring                             | 29.0            | 30.8            | 27.2            | 31.9            | 28.2            | 31.8            | 28.5            | 31.4            | 28.4            | 31.4            | 30.6            | 28.1            | 29.3            | 30.6            |
| Summer                             | 14.1            | 15.4            | 13.1            | 15.4            | 14.0            | 15.1            | 14.2            | 14.3            | 14.1            | 14.4            | 14.5            | 14.5            | 13.8            | 14.4            |
| Fall                               | 33.6            | 31.1            | 35.1            | 31.3            | 33.8            | 31.3            | 32.6            | 31.7            | 32.5            | 31.7            | 33.0            | 32.8            | 33.4            | 31.8            |
| Alcohol, %                         |                 |                 |                 |                 |                 |                 |                 |                 |                 |                 |                 |                 |                 |                 |
| Zero reporters                     | 8.6             | 5.2             | 9.1             | 4.7             | 9.3             | 4.5             | 8.9             | 5.0             | 8.9             | 5.0             | 6.3             | 7.0             | 7.2             | 6.0             |
| Low                                | 41.7            | 37.2            | 47.5            | 34.3            | 45.8            | 34.4            | 43.1            | 36.1            | 43.3            | 35.9            | 37.6            | 41.7            | 41.6            | 39.1            |
| Moderate                           | 23.3            | 23.9            | 21.3            | 25.8            | 21.5            | 24.9            | 22.7            | 23.9            | 22.7            | 24.0            | 23.0            | 22.7            | 22.7            | 24.3            |
| High                               | 19.0            | 24.2            | 16.5            | 24.9            | 17.3            | 25.7            | 18.3            | 25.0            | 18.1            | 25.1            | 23.2            | 20.6            | 20.6            | 21.6            |
| Very high                          | 7.4             | 9.4             | 5.5             | 10.3            | 6.0             | 10.5            | 7.1             | 9.9             | 7.0             | 10.0            | 9.8             | 8.0             | 7.9             | 9.0             |
| Smoking status, %                  |                 |                 |                 |                 |                 |                 |                 |                 |                 |                 |                 |                 |                 |                 |
| Current smoker                     | 24.6            | 34.1            | 30.5            | 26.6            | 26.3            | 29.9            | 29.0            | 29.9            | 28.8            | 29.9            | 26.2            | 34.2            | 27.8            | 30.1            |
| Ex-smoker                          | 34.4            | 32.2            | 30.8            | 35.5            | 32.1            | 33.9            | 31.1            | 35.8            | 31.1            | 35.8            | 36.3            | 29.5            | 35.0            | 32.3            |
| Never smoker                       | 41.0            | 33.6            | 38.6            | 38.0            | 41.5            | 36.2            | 39.9            | 34.3            | 40.1            | 34.3            | 37.4            | 36.2            | 37.1            | 37.6            |
| Education, %                       |                 |                 |                 |                 |                 |                 |                 |                 |                 |                 |                 |                 |                 |                 |
| Elementary                         | 37.7            | 42.5            | 38.9            | 40.8            | 38.3            | 42.0            | 40.3            | 41.1            | 40.1            | 41.2            | 37.3            | 42.4            | 38.4            | 42.5            |
| Primary and secondary              | 24.9            | 27.2            | 26.6            | 26.6            | 24.9            | 26.8            | 25.6            | 27.0            | 25.6            | 26.9            | 26.5            | 26.1            | 27.3            | 26.6            |
| Upper secondary                    | 9.4             | 9.6             | 10.0            | 8.7             | 9.7             | 9.1             | 8.5             | 9.7             | 8.5             | 9.7             | 10.7            | 8.7             | 10.4            | 8.4             |
| Further education without a degree | 10.2            | 8.4             | 8.9             | 9.8             | 9.4             | 9.0             | 9.1             | 9.0             | 9.0             | 9.0             | 10.2            | 8.1             | 9.3             | 8.7             |
| University degree                  | 17.4            | 12.4            | 15.4            | 13.9            | 17.2            | 13.0            | 16.3            | 13.1            | 16.5            | 13.1            | 15.1            | 14.4            | 14.4            | 13.5            |
| Leisure time physical activity, %  |                 |                 |                 |                 |                 |                 |                 |                 |                 |                 |                 |                 |                 |                 |
| Very low                           | 8.7             | 11.4            | 12.8            | 8.9             | 10.5            | 9.8             | 9.4             | 10.5            | 9.4             | 10.6            | 9.6             | 10.7            | 11.2            | 9.4             |
| Low                                | 31.1            | 33.8            | 34.2            | 31.1            | 32.0            | 32.4            | 31.0            | 35.6            | 31.0            | 35.5            | 34.4            | 32.2            | 34.6            | 31.2            |
| Medium                             | 28.8            | 28.2            | 27.0            | 28.4            | 28.9            | 28.2            | 27.1            | 27.6            | 27.1            | 27.7            | 28.7            | 28.2            | 28.1            | 27.9            |
| High                               | 20.5            | 18.3            | 17.5            | 20.9            | 18.7            | 20.2            | 20.9            | 17.6            | 21.0            | 17.6            | 18.3            | 19.1            | 18.3            | 20.8            |
| Very high                          | 10.2            | 7.6             | 7.8             | 10.1            | 9.2             | 9.0             | 11.1            | 7.7             | 11.0            | 7.7             | 8.1             | 9.5             | 6.9             | 10.3            |

<sup>1</sup>Data is expressed as median (inter-quartile range) or as proportions (%),  $n = 24,032$  participants except for BMI,  $n = 24,003$ ; cigarette smoking status,  $n = 24,022$ ; education,  $n = 23,977$ ; leisure time physical activity,  $n = 23,881$ . ALA,  $\alpha$ -linolenic acid; LA, linoleic acid; LC n-3, long-chain n-3 PUFAs.

<sup>2</sup>Chi-square test was used for categorical and general linear model was used for continuous variables adjusted for age and sex.
