# Supplementary material
Source: PubMed Central journal article supplement (PMC4130826)
Supplement: jn.114.192708_nutrition192708SupplementaryData3.pdf [file jn.114.192708_nutrition192708SupplementaryData3.pdf]

**Online Supporting Material**

**Supplemental Table 3** Correlation between PUFA intakes and macronutrients among 24,032 participants in the Malmö diet and cancer cohort<sup>1</sup>

| Dietary intakes, E% | ALA  | LC n-3 | Total n-3 | LA   | Total n-6 | ALA/LA | Total n-3/n-6 | Carbohydrates | Protein | Fat   |
|---------------------|------|--------|-----------|------|-----------|--------|---------------|---------------|---------|-------|
| ALA                 | 1.00 | 0.04   | 0.72      | 0.57 | 0.57      | 0.29   | 0.11          | -0.47         | -0.27   | 0.58  |
| LC n-3              |      | 1.00   | 0.66      | 0.03 | 0.04      | 0.04   | 0.58          | -0.17         | 0.27    | 0.05  |
| Total n-3           |      |        | 1.00      | 0.40 | 0.40      | 0.24   | 0.49          | -0.44         | -0.02   | 0.44  |
| LA                  |      |        |           | 1.00 | 1.00      | -0.56  | -0.54         | -0.30         | -0.11   | 0.34  |
| Total n-6           |      |        |           |      | 1.00      | -0.56  | -0.54         | -0.30         | -0.10   | 0.35  |
| ALA/LA              |      |        |           |      |           | 1.00   | 0.77          | -0.10         | -0.11   | 0.14  |
| Total n-3/n-6       |      |        |           |      |           |        | 1.00          | -0.12         | 0.09    | 0.06  |
| Carbohydrates       |      |        |           |      |           |        |               | 1.00          | -0.16   | -0.91 |
| Protein             |      |        |           |      |           |        |               |               | 1.00    | -0.23 |
| Fat                 |      |        |           |      |           |        |               |               |         | 1.00  |

<sup>1</sup>Spearman's bivariate correlation coefficient was used to examine associations between PUFA intakes and macronutrients. ALA,  $\alpha$ -linolenic acid; E%, energy percentage; LA, linoleic acid; LC n-3, long-chain n-3 PUFAs.
